# Supplementary figures and images for: Proteomic identification of organic additives in the mortars of ancient Chinese wooden buildings
Source: Royal Society of Chemistry journal article supplement (doi:10.1039/c4ay01766h), 2014-10-21

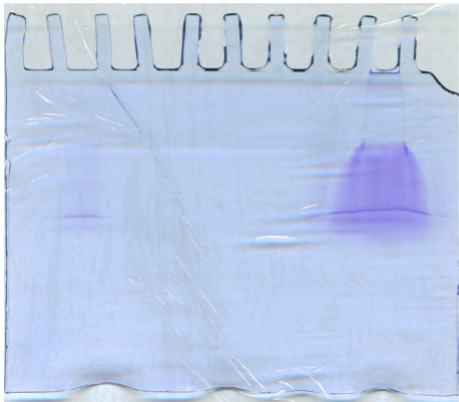

Supplement: c4ay01766h4.pdf [file c4ay01766h4.pdf]
